# Supplementary material for: Impairment of the intracranial lymphatic system in Parkinson's disease: a combined study of the meningeal lymphatics vessels and glymphatic system based on noninvasive neuroimaging
Source: Research Square preprint supplement (doi:10.21203/rs.3.rs-6250218/v1), 2025-04-16
Supplement: Supplementary file 1 [file 4bccb286c3f5e802f8cf5680.docx]

Table S1：Comparison of MLVs volume between PD and HC groups

|  | PD (n=31) | HC (n=31) | t/Z | *p* |
| --- | --- | --- | --- | --- |
| TIV（cm3） | 1409.74±128.29 | 1441.81±164.94 | -0.854a | 0.396 |
| L-MLVV/TIV | 0.38 (0.15) | 0.28 (0.15) | -3.189b | 0.001** |
| R-MLVV/TIV | 0.41±0.17 | 0.31±0.1 | 2.941a | 0.005** |
| T-MLVV/TIV | 0.83 (0.4) | 0.62±0.15 | -3.104b | 0.002** |

a stands for t. b stands for Z. * *p*< 0.05, ** *p*< 0.01

Table S2：Comparison of MLVs volume in HC、ePD and aPD groups

|  | HC (n=31) | ePD (n=5) | aPD (n=26) | H | *p* |
| --- | --- | --- | --- | --- | --- |
| L-MLVV/TIV | 0.28 (0.15) | 0.42 (0.07) | 0.35 (0.17) | 11.064 | 0.004** |
| R-MLVV/TIV | 0.31 (0.13) | 0.43 (0.11) | 0.36 (0.25) | 7.951 | 0.019* |
| T-MLVV/TIV | 0.6 (0.27) | 0.85 (0.05) | 0.74 (0.44) | 11.538 | 0.003** |

H stands for the Kruskal-Wallis test. * *p*< 0.05, ** *p*< 0.01

Table S3：Pair comparison of MLVs volume in HC、ePD and aPD groups (*p* value)

|  | HC vs ePD | HC vs aPD | ePD vs aPD |
| --- | --- | --- | --- |
| n | 31 vs 5 | 31 vs 26 | 5 vs 26 |
| L-MLVV/TIV | 0.001** | 0.018* | 0.979 |
| R-MLVV/TIV | 0.011* | 0.049* | 0.709 |
| T-MLVV/TIV | ＜0.001** | 0.019* | 0.791 |

* *p*< 0.05, ** *p*< 0.01

Table S4：Comparison of MLVs volume in tPD、mPD and t-mPD groups

|  | tPD (n=5) | mPD (n=15) | t-mPD (n=11) | H | *p* |
| --- | --- | --- | --- | --- | --- |
| L-MLVV/TIV | 0.31 (0.20) | 0.38 (0.14) | 0.42 (0.15) | 2.672 | 0.263 |
| R-MLVV/TIV | 0.30 (0.13) | 0.41 (0.20) | 0.46 (0.23) | 5.428 | 0.066 |
| T-MLVV/TIV | 0.56 (0.31) | 0.83 (0.40) | 0.85 (0.46) | 2.990 | 0.224 |

H stands for the Kruskal-Wallis test.

Table S5：Pair comparison of MLVs volume in tPD、mPD and t-mPD groups (*p* value)

|  | tPD vs mPD | mPD vs t-mPD | tPD vs t-mPD |
| --- | --- | --- | --- |
| n | 5 vs 15 | 15 vs 11 | 5 vs 11 |
| L-MLVV/TIV | 0.701 | 0.873 | 0.546 |
| R-MLVV/TIV | 0.143 | 0.356 | 0.025* |
| T-MLVV/TIV | 0.364 | 0.566 | 0.126 |

* *p*< 0.05

Table S6：Comparison of Dxproj、Dxassoc、Dyproj、Dzassoc and DTI-ALPS indices between

PD and HC groups

|  | PD (n=31) | HC (n=31) | t | *p* |
| --- | --- | --- | --- | --- |
| Dxproj (x10-4) | 5.8±0.59 | 6.2±0.53 | 2.91 | 0.005* |
| Dxassoc (x10-4) | 6.5±0.87 | 6.3±0.82 | -1.022 | 0.311 |
| Dyproj (x10-4) | 5.4±0.69 | 5.0±0.73 | -2.21 | 0.031* |
| Dzassoc (x10-4) | 3.9±0.67 | 3.8±0.58 | -0.664 | 0.509 |
| DTI-ALPS index | 1.33±0.1 | 1.43±0.12 | 3.587 | 0.001* |

t stands for *t* test. * *p*< 0.05

Table S7：Comparison of Dxproj、Dxassoc、Dyproj、Dzassoc and DTI-ALPS indices in

HC、ePD and aPD groups

|  | HC (n=31) | ePD (n=5) | aPD (n=26) | H | *p* |
| --- | --- | --- | --- | --- | --- |
| Dxproj (x10-4) | 6.1 (0.77) | 5.4 (1.2) | 5.8 (0.77) | 8.465 | 0.015* |
| Dxassoc (x10-4) | 6.2 (0.88) | 7.2 (1.5) | 6.8 (0.73) | 4.261 | 0.119 |
| Dyproj (x10-4) | 5.0 (0.95) | 4.6 (1.5) | 5.5 (0.98) | 8.983 | 0.011* |
| Dzassoc (x10-4) | 3.7 (1.1) | 4.0 (1.6) | 3.9 (0.94) | 0.89 | 0.641 |
| DTI-ALPS index | 1.41 (0.16) | 1.42 (0.15) | 1.28 (0.12) | 20.055 | ＜0.001** |

H stands for the Kruskal-Wallis test. * *p*< 0.05, ** *p*< 0.01

Table S8：Pair comparison of Dxproj、Dxassoc、Dyproj、Dzassoc and DTI-ALPS indices in

HC、ePD and aPD groups (*p* values)

|  | HC vs ePD | HC vs aPD | ePD vs aPD |
| --- | --- | --- | --- |
| n | 31 vs 5 | 31 vs 26 | 5 vs 26 |
| Dxproj | 0.430 | 0.022* | 0.993 |
| Dxassoc | 0.415 | 0.805 | 0.569 |
| Dyproj | 0.859 | 0.014* | 0.253 |
| Dzassoc | 0.924 | 0.829 | 0.987 |
| DTI-ALPS index | 0.829 | ＜0.001** | 0.022* |

* *p*< 0.05, ** *p*< 0.01

Table S9：Comparison of Dxproj、Dxassoc、Dyproj、Dzassoc and DTI-ALPS indices in

tPD、mPD and t-mPD groups

|  | tPD(n=5) | mPD(n=15) | t-mPD(n=11) | H | *P* |
| --- | --- | --- | --- | --- | --- |
| Dxproj (x10-4) | 5.8 (1.1) | 5.5 (0.9) | 5.9 (0.7) | 0.279 | 0.870 |
| Dxassoc (x10-4) | 6.3 (0.7) | 6.8 (1.1) | 6.7 (0.7) | 1.394 | 0.498 |
| Dyproj (x10-4) | 5.6 (0.4) | 5.1 (1.0) | 5.6 (1.6) | 1.874 | 0.392 |
| Dzassoc (x10-4) | 3.8 (0.6) | 4.0 (1.1) | 4.0 (1.1) | 1.345 | 0.510 |
| DTI-ALPS index | 1.28 (0.09) | 1.37 (0.21) | 1.31 (0.16) | 1.252 | 0.535 |

H stands for the Kruskal-Wallis test.

Table S10：Pair comparison of Dxproj、Dxassoc、Dyproj、Dzassoc and DTI-ALPS indices in

tPD、mPD and t-mPD groups (*p* values)

|  | tPD vs mPD | mPD vs t-mPD | tPD vs t-mPD |
| --- | --- | --- | --- |
| n | 5 vs 15 | 15 vs 11 | 5 vs 11 |
| Dxproj | 0.997 | 0.997 | 0.990 |
| Dxassoc | 0.470 | 0.795 | 0.934 |
| Dyproj | 0.181 | 0.733 | 0.969 |
| Dzassoc | 0.574 | 0.987 | 0.717 |
| DTI-ALPS | 0.438 | 0.409 | 0.995 |

Table S11：Correlation analysis between clinical data and neuroimaging indices in PD group.

|  |  | Age | Education years | Disease course | MMSE | H-Y scale | EPVS | UPDRS III | T-MLVV /TIV | DTI- ALPS |
| --- | --- | --- | --- | --- | --- | --- | --- | --- | --- | --- |
| Age | *r* | 1.000 |  |  |  |  |  |  |  |  |
| Education years | 0.124 | 1.000 |  |  |  |  |  |  |  |
| Disease course | -0.073 | 0.143 | 1.000 |  |  |  |  |  |  |
| MMSE | 0.045 | 0.298 | 0.293 | 1.000 |  |  |  |  |  |
| H-Y scale | 0.125 | 0.182 | 0.225 | -0.413* | 1.000 |  |  |  |  |
| EPVS | 0.276 | 0.074 | -0.131 | -0.107 | -0.394 | 1.000 |  |  |  |
| UPDRS  III | 0.040 | 0.172 | 0.336 | -0.128 | 0.685** | -0.095 | 1.000 |  |  |
| T-MLVV /TIV | 0.013 | 0.004 | -0.079 | -0.012 | 0.049 | -0.058 | -0.150 | 1.000 |  |
| DTI- ALPS | -0.293 | 0.029 | 0.012 | 0.314 | -0.371* | 0.121 | -0.082 | -0.176 | 1.000 |

*r* is the correlation coefficient。* *p*＜0.05，***p*＜0.01

Table S12：Correlation analysis between clinical data and neuroimaging indices in HC group.

|  |  | 年龄 | 受教育年限 | MMSE | EPVS | T-MLVV  /TIV | DTI-  ALPS | CP/TIV |
| --- | --- | --- | --- | --- | --- | --- | --- | --- |
| 年龄 | *r* | 1.000 |  |  |  |  |  |  |
| 受教育年限 | -0.344 | 1.000 |  |  |  |  |  |
| MMSE | -0.263 | 0.372* | 1.000 |  |  |  |  |
| EPVS | 0.328 | 0.022 | -0.038 | 1.000 |  |  |  |
| T-MLVV  /TIV | 0.457** | -0.108 | -0.164 | 0.180 | 1.000 |  |  |
| DTI-ALPS | 0.046 | 0.086 | 0.085 | -0.238 | 0.103 | 1.000 |  |
| CP/TIV | 0.355 | -0.131 | -0.004 | 0.459** | 0.225 | -0.045 | 1.000 |

*r* is the correlation coefficient. * *p*＜0.05，***p*＜0.01
